# Supplementary material
Source: Royal Society of Chemistry journal article supplement (doi:10.1039/d6cy00351f)
Supplement: d6cy00351f1.pdf [file d6cy00351f1.pdf]

## Supporting Information for

### Theoretical Study on Selective Adsorption, Synergistic Effects, and Conversion of NO<sub>2</sub> and SO<sub>2</sub> on Cu<sub>g</sub>/PCN

Xue Yin,<sup>a</sup> Wei Lin\*<sup>ab</sup>

<sup>a</sup> State Key Laboratory of Photocatalysis on Energy and Environment, College of Chemistry, Fuzhou University, Fuzhou 350108, P.R. China

<sup>b</sup> Fujian Key Laboratory of Theoretical and Computational Chemistry, Xiamen University, Xiamen, Fujian 361005, China

\* E-mail: wlin@fzu.edu.cn (W. Lin)

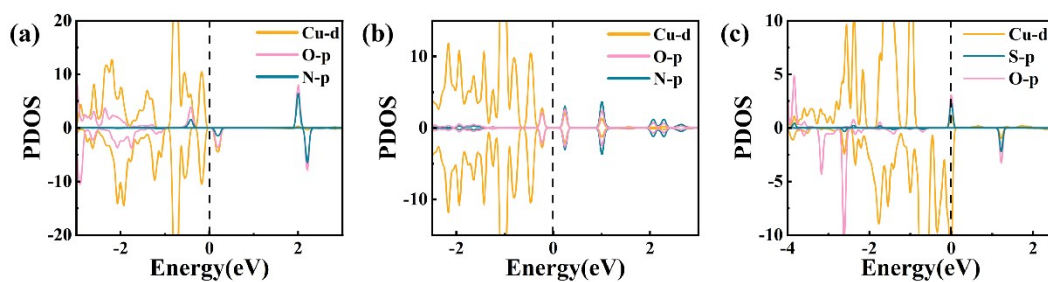

**Fig. S1.** Projected density of states (PDOS) for the adsorption of (a) 2NO<sub>2</sub>, (b) 2NO, and (c) SO<sub>2</sub> on Cu<sub>g</sub>/PCN. The Fermi level is set to 0 eV (black dashed line).

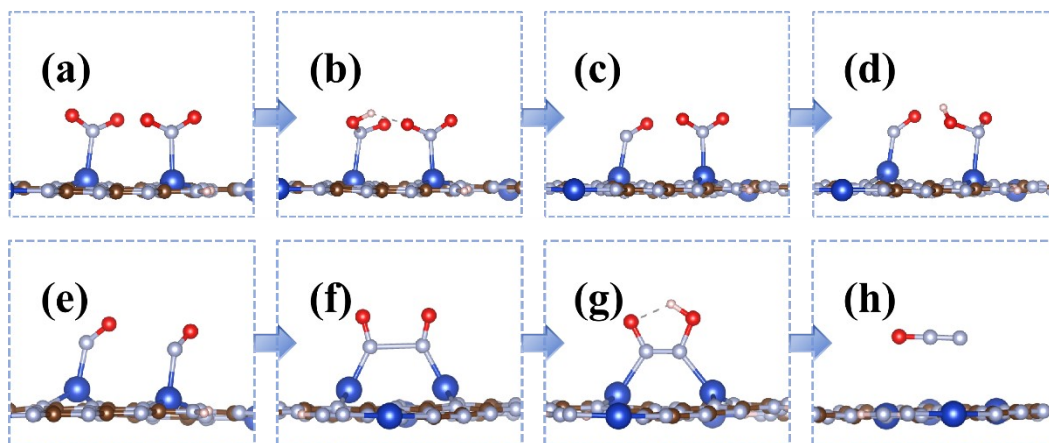

**Fig. S2.** Optimized structures of species involved in the  $\text{NO}_2$ -to- $\text{N}_2\text{O}$  reduction pathway on  $\text{Cu}_9/\text{PCN}$ . (a)  $^*\text{NO}_2 + ^*\text{NO}_2$ ; (b)  $^*\text{HNO}_2 + ^*\text{NO}_2$ ; (c)  $^*\text{NO} + ^*\text{NO}_2$ ; (d)  $^*\text{NO} + ^*\text{NO}_2\text{H}$ ; (e)  $^*\text{NO} + ^*\text{NO}$ ; (f)  $^*\text{NONO}$  (spontaneous N-N coupling from e; this configuration is identical to the directly adsorbed NO dimer shown in Fig. 1c); (g)  $^*\text{NONOH}$ ; (h)  $\text{N}_2\text{O}(\text{g})$  (after desorption). The arrow from (e) to (f) indicates the thermodynamically favored structural relaxation from two isolated  $^*\text{NO}$  to the more stable bridging  $^*\text{NONO}$  configuration.

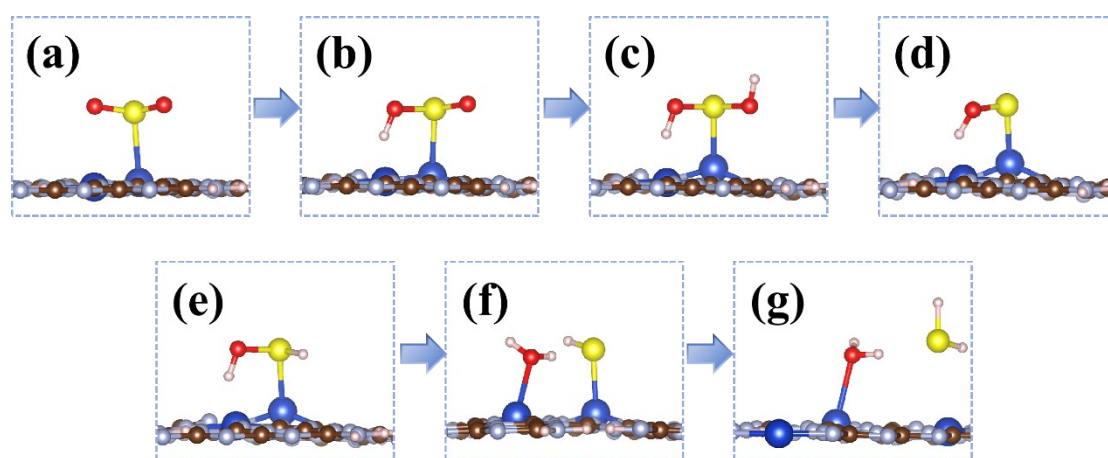

**Fig. S3.** Optimized structures of species involved in the  $\text{SO}_2$ -to- $\text{H}_2\text{S}$  reduction pathway on  $\text{Cu}_9/\text{PCN}$ . (a)  $^*\text{SO}_2$ ; (b)  $^*\text{HOSO}$ ; (c)  $^*\text{S}(\text{OH})_2$ ; (d)  $^*\text{SOH}$ ; (e)  $^*\text{HSOH}$ ; (f)  $^*\text{SH} + ^*\text{H}_2\text{O}$ ; (g)  $\text{H}_2\text{S}(\text{g})$  (after desorption).

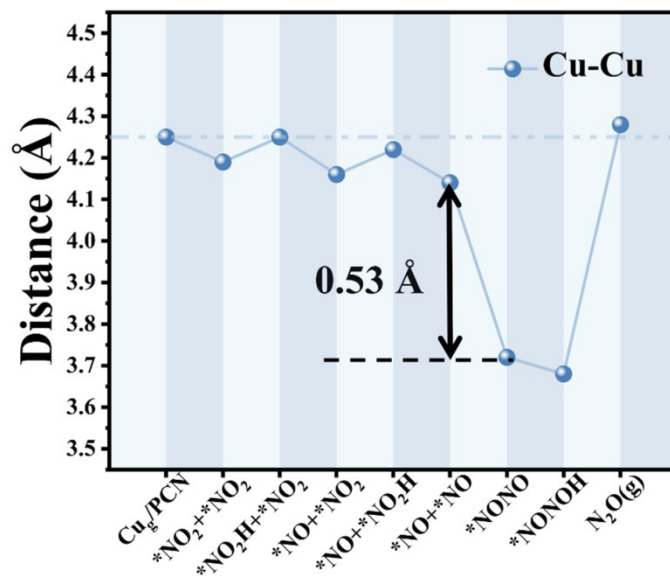

**Fig. S4.** Evolution of the Cu–Cu distance along the NO<sub>2</sub>-to-N<sub>2</sub>O reduction pathway on Cu<sub>9</sub>/PCN. The distances correspond to the species shown in Figure S2. The dashed line indicates the Cu–Cu distance in pristine Cu<sub>9</sub>/PCN (4.25 Å). The arrow highlights the contraction from two isolated \*NO to the bridging \*NONO configuration.

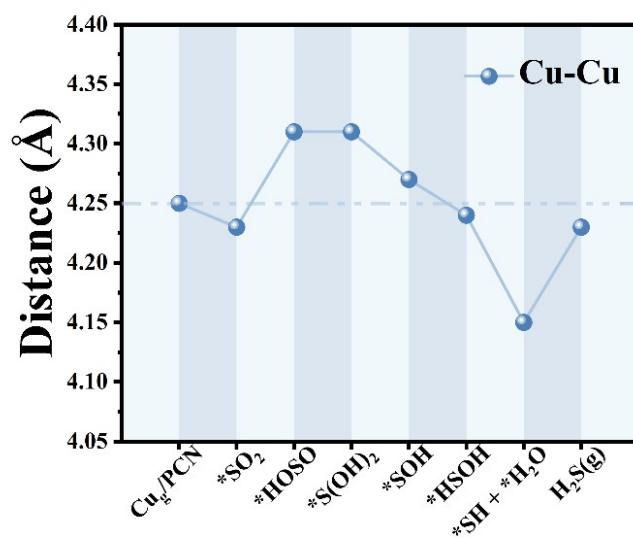

**Fig. S5.** Evolution of the Cu–Cu distance along the SO<sub>2</sub>-to-H<sub>2</sub>S reduction pathway on Cu<sub>9</sub>/PCN. The distances correspond to the species shown in Figure S3. The dashed line indicates the Cu–Cu distance in pristine Cu<sub>9</sub>/PCN (4.25 Å).
